# Supplementary material for: Characterization of LGR5 stem cells in colorectal adenomas and carcinomas
Source: PubMed Central journal article supplement (PMC4345329; doi:10.1038/srep08654), 2015-03-02

## SUPPLEMENTARY TABLE, FIGURES AND LEGENDS

### ‘Characterization of LGR5 stem cells in colorectal adenomas and carcinomas’

Ann-Marie Baker, Trevor A. Graham, George Elia, Nicholas A. Wright, Manuel Rodriguez-Justo

#### Supplementary Table 1

Table showing the distribution of samples that were collected from the proximal colon, distal colon and rectum.

Proximal colon = caecum, ascending colon, hepatic flexure, transverse colon; Distal colon = splenic flexure, descending colon, sigmoid colon; Rectum = rectosigmoid, rectum.

HPP = hyperplastic polyp, SSA/P = sessile serrated adenoma/polyp, TSA = traditional serrated adenoma, CRC = colorectal cancer.

| Sample group         | Proximal colon | Distal colon | Rectum | <b>Total</b> |
|----------------------|----------------|--------------|--------|--------------|
| Normal               | 4              | 3            | 0      | <b>7</b>     |
| HPP                  | 3              | 2            | 2      | <b>7</b>     |
| SSA/P                | 6              | 0            | 0      | <b>6</b>     |
| TSA                  | 0              | 1            | 5      | <b>6</b>     |
| Non-serrated adenoma | 5              | 8            | 4      | <b>17</b>    |
| CRC                  | 7              | 11           | 5      | <b>23</b>    |

### Supplementary Figure S1. Validation of ISH detection of *LGR5*

**A.** Representative images showing serial sections hybridized with the *LGR5* probe (left panel) or the *dapB* negative control probe (right panel). Scale bars represent 200 micron, scale bars of inserts represent 50 micron. Site = transverse colon.

**B.** Representative images showing serial sections hybridized with the *LGR5* probe, then detected with Fast Red (left panel) or DAB (right panel). It can be seen that *LGR5* is detected in the same cells, regardless of the detection method. Scale bars represent 100 micron, scale bars of inserts represent 20 micron. Site = sigmoid colon.

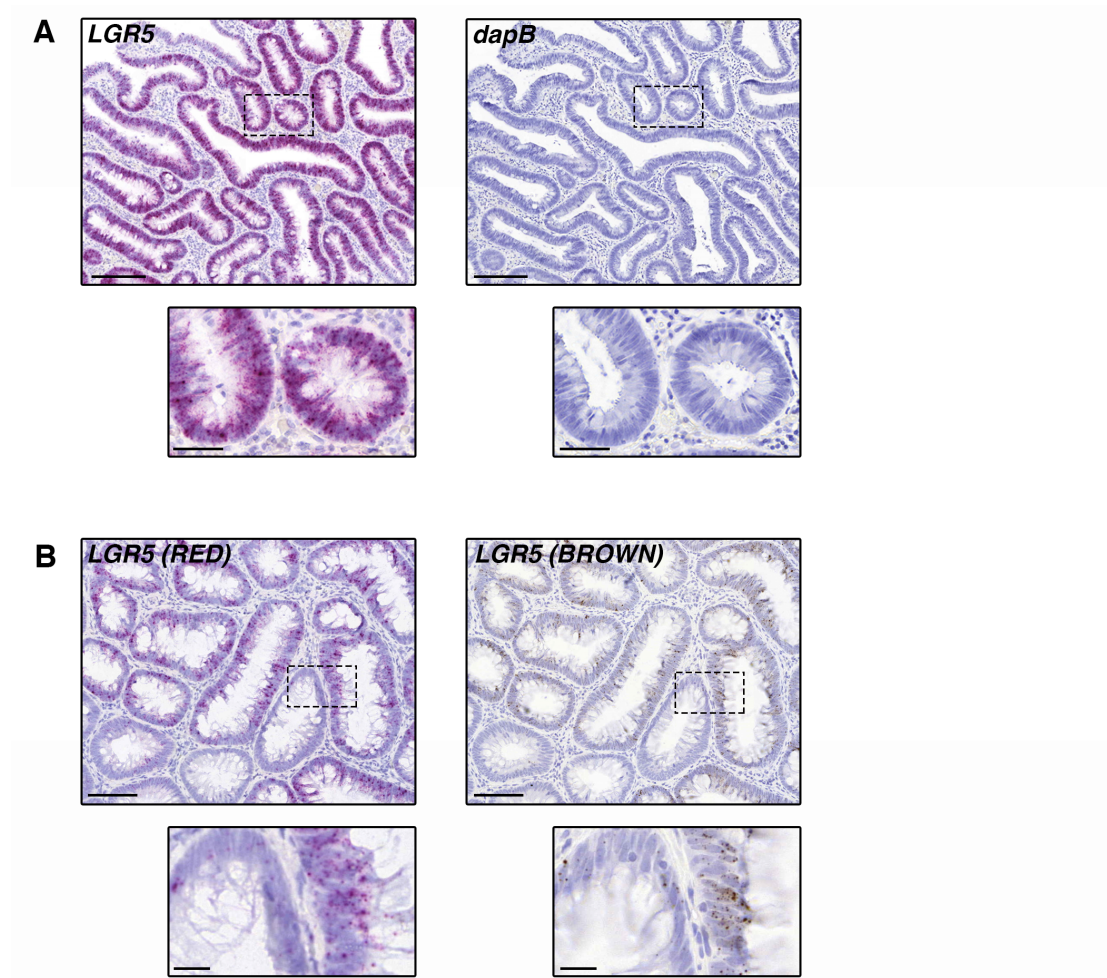

## Supplementary Figure S2. *LGR5* expression in small intestine

**A.** Representative H&E staining, *in situ* hybridization (*LGR5*; pink) and immunohistochemical staining (Ki67, KRT20, CD44; brown) in a human small intestine sample. Scale bars represent 100 micron, scale bars of inserts represent 20 micron.

**B.** Graph showing average *LGR5* staining intensity at the base of normal colon and small intestine crypts. Mean number of crypts counted = 11 per group. Error bars represent mean  $\pm$  SEM.

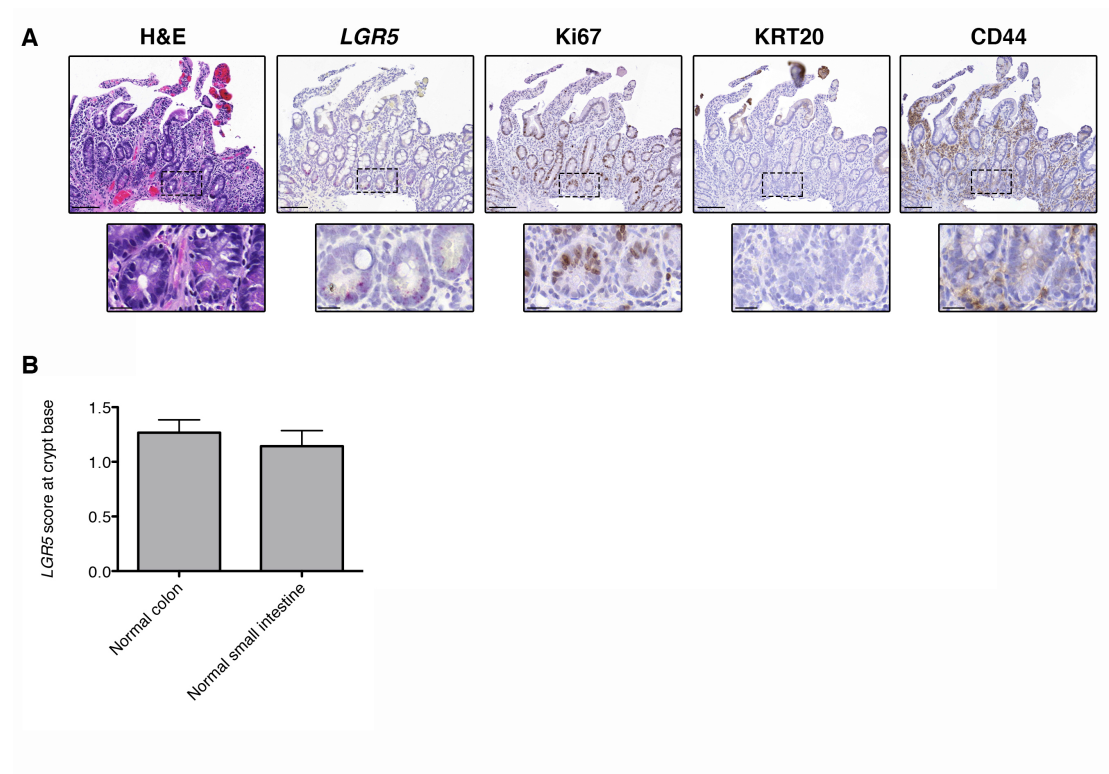

### Supplementary Figure S3. Quantification of *LGR5* at the crypt base

Graph showing average *LGR5* staining intensity at the crypt base in normal colon, hyperplastic polyps (HPP), sessile serrated adenomas/polyps (SSA/P) and traditional serrated adenomas (TSA). Mean number of crypts counted = 23 per group. Error bars represent mean  $\pm$  SEM, \*\* $p < 0.01$  and \*\*\* $p < 0.001$  by the two-sided Student's t test.

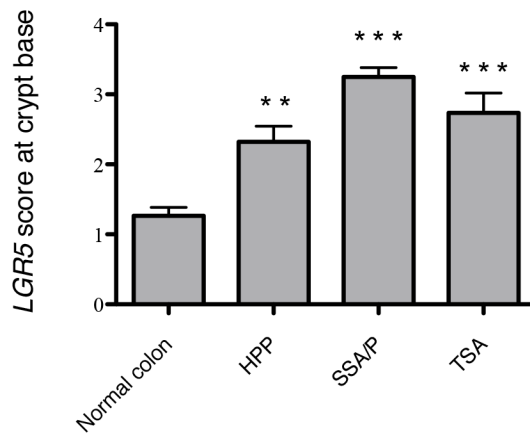

**Supplementary Figure S4. *LGR5* mRNA expression in non-serrated adenomas**

Representative H&E staining and *in situ* hybridization (*LGR5*; pink) in non-serrated adenomas from six patients. Scale bar represents 200 micron.

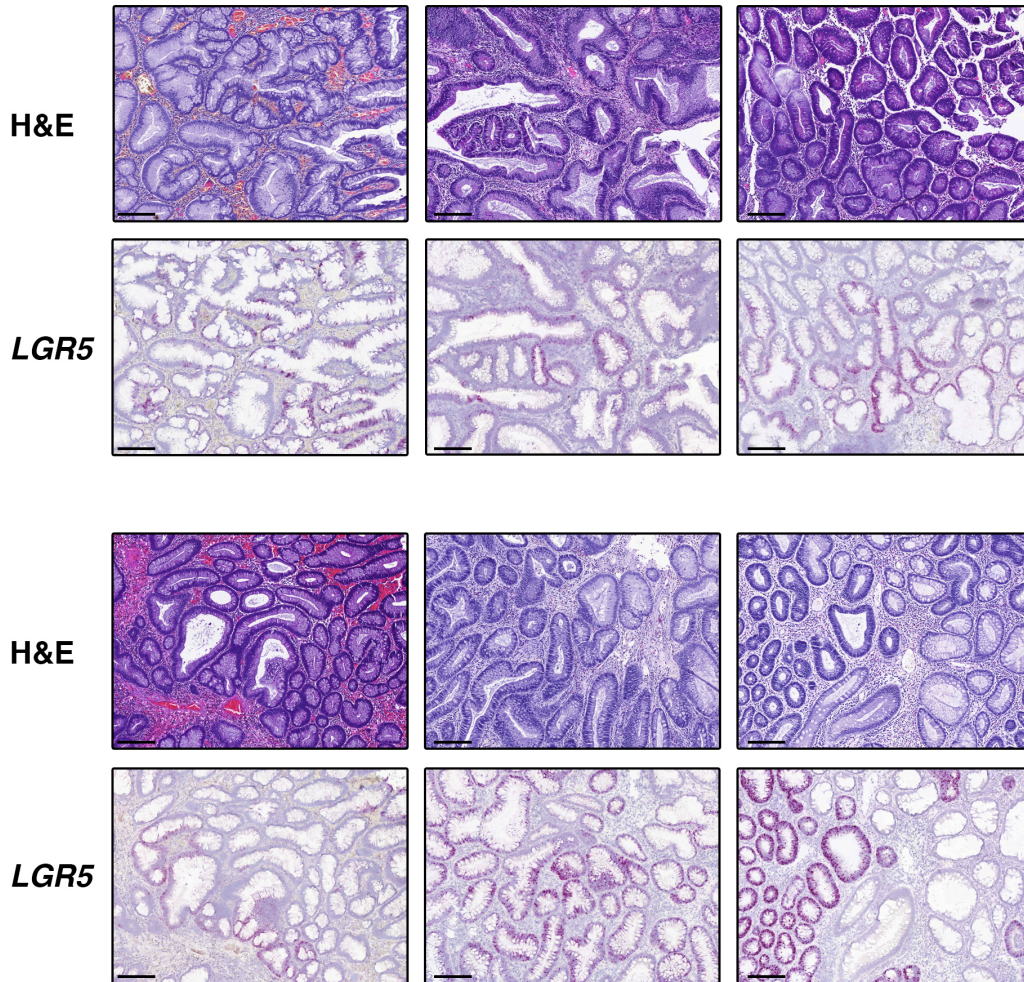

### Supplementary Figure S5. *LGR5* expression in adenocarcinomas

Representative H&E staining and *in situ* hybridization (*LGR5*; pink) in adenocarcinomas of stages pT1 (A.), pT2 (B.), pT3 (C.) and pT4 (D.). Scale bars represent 200 micron.

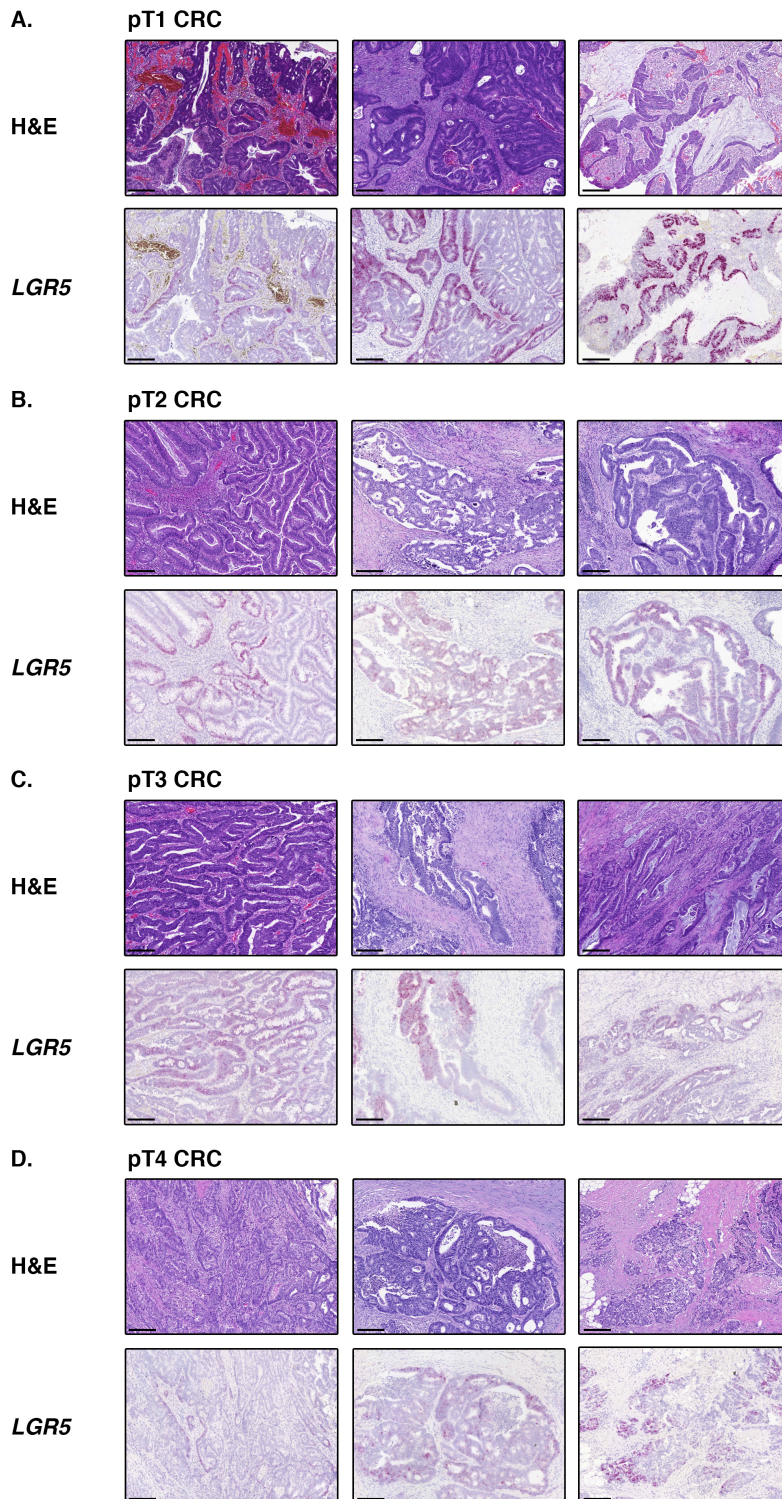

**Supplementary Figure S6. Semiquantitative analysis of Ki67, KRT20 and CD44 expression in adenocarcinomas**

**A.** Representative images showing no marker expression (0), weak expression (1), moderate expression (2) and strong expression (3). Scale bars represent 50 micron.

**B.** Graph showing the distribution of expression levels of Ki67, KRT20 and CD44 in adenocarcinomas (n = 23).

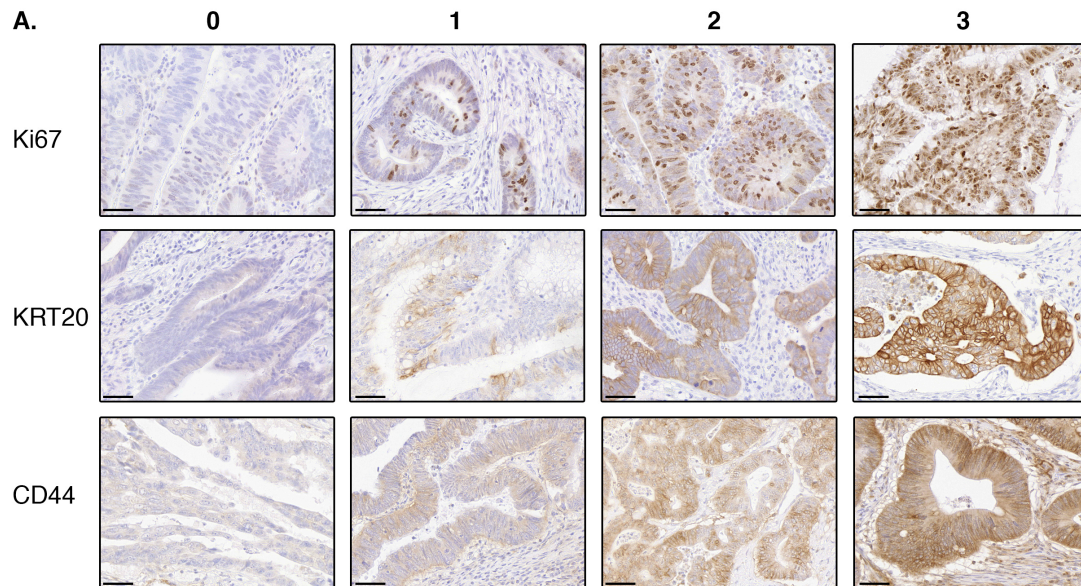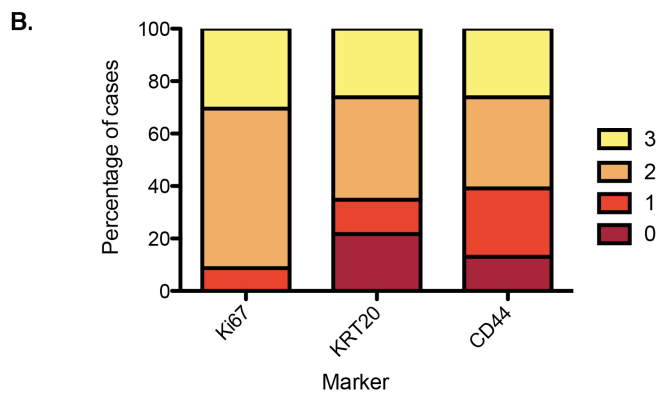

Supplement: srep08654-s1.pdf [file srep08654-s1.pdf]
